# Supplementary material for: Epitaxial growth and nanoscale electrical properties of Ce2Ti2O7thin films
Source: Royal Society of Chemistry journal article supplement (doi:10.1039/c6ra01225f), 2016-01-01
Supplement: c6ra01225f1.pdf [file c6ra01225f1.pdf]

## Supporting Information

# Epitaxial growth and nanoscale electrical properties of $\text{Ce}_2\text{Ti}_2\text{O}_7$ thin films

Alexandre Bayart, ZhenMian Shao, Anthony Ferri, Pascal Roussel, Rachel Desfeux,

Sébastien Saitzek\*

*Univ. Artois, CNRS, Centrale Lille, ENSCL, Univ. Lille, UMR 8181, Unité de Catalyse et Chimie du Solide (UCCS), F-62300 Lens, France*

---

**\*Corresponding author:**

**Sébastien SAITZEK,**

<sup>1</sup>Université d'Artois, Unité de Catalyse et de Chimie du Solide, UCCS,  
Axe Chimie du Solide, CNRS-UMR 8181, Faculté des Sciences Jean Perrin,  
F-62300 LENS, France

Phone: +33 / 321791732, Fax: +33 / 321177955, E-mail: [sebastien.saitzek@univ-artois.fr](mailto:sebastien.saitzek@univ-artois.fr)

To highlight local ferroelectricity in the films, poling experiments were performed. Commonly, rectangular-shaped domains ( $\sim 12 \mu\text{m} \times 10 \mu\text{m}$ ) were polarized by applying a negative bias voltage ( $V_{\text{dc}} = -12 \text{ V}$ ) on the CeTO film. Next, second rectangle ( $\sim 9 \mu\text{m} \times 7 \mu\text{m}$ ) were reverse polarized inside the previous polarized areas by applying a positive bias voltage ( $V_{\text{dc}} = +12 \text{ V}$ ). Then, third rectangle ( $\sim 5 \mu\text{m} \times 4 \mu\text{m}$ ) were polarized by applying a negative bias voltage ( $V_{\text{dc}} = -12 \text{ V}$ ). Finally, PFM images were recorded over large regions ( $\sim 15 \mu\text{m} \times 15 \mu\text{m}$ ) including the three polarized areas (Figure S1). Ferroelectric properties are present regardless of the synthetic route used.

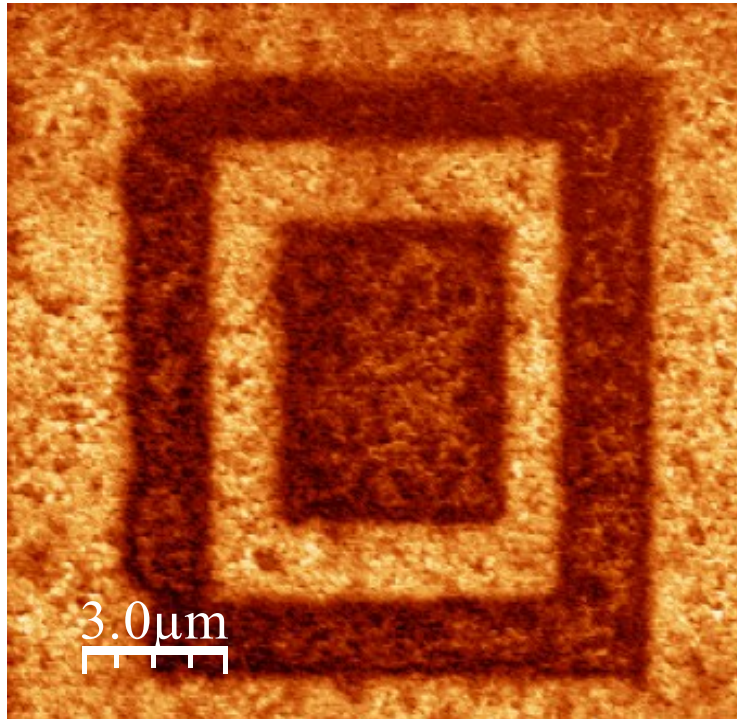

Figure S1. Out-of-plane piezoresponse image after poling and reverse poling experiments recorded on a  $\text{Ce}_2\text{Ti}_2\text{O}_7$  thin film grown on (110)-oriented  $\text{SrTiO}_3$  substrate by PLD. The scan area is  $15 \mu\text{m} \times 15 \mu\text{m}$ .

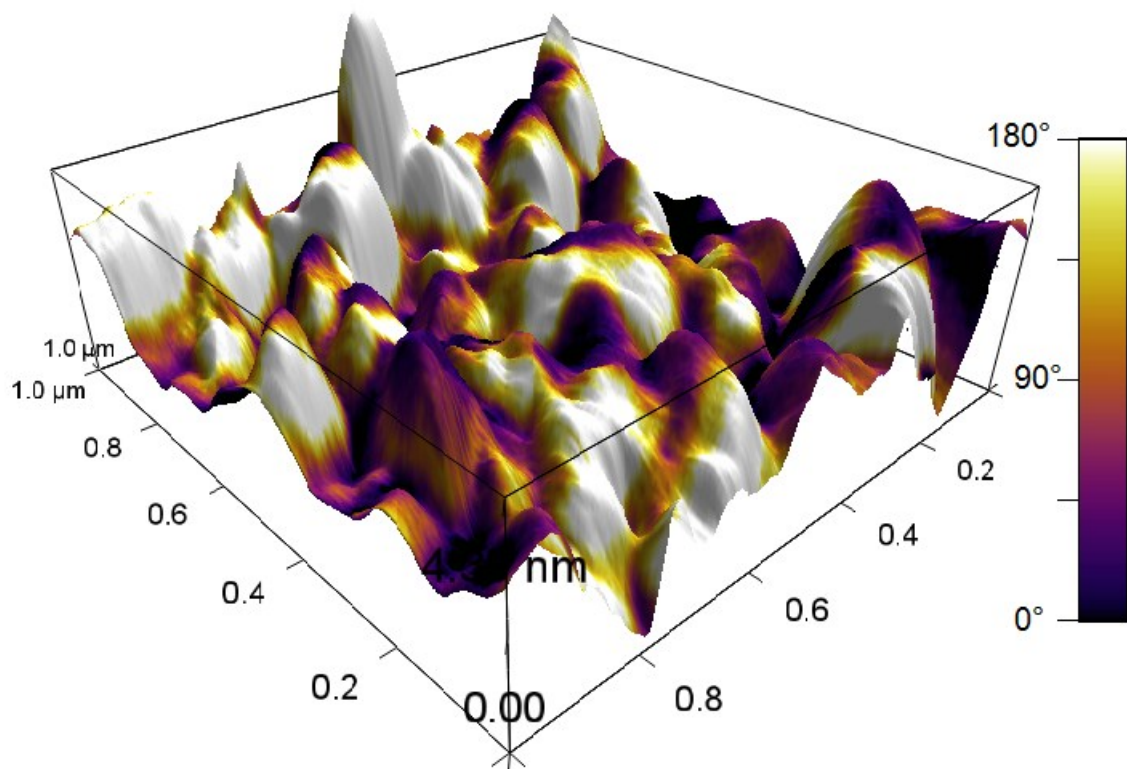

Figure S2. Projection of in-plane piezoelectric domains on the 3D topography of the CeTO thin film grown by PLD.
